# Supplementary material
Source: PubMed Central journal article supplement (PMC4915481)
Supplement: NIHMS790654-supplement-Supplementary_Figures_1__2__3.pdf [file NIHMS790654-supplement-Supplementary_Figures_1__2__3.pdf]

## Supplemental Fig. S1.

B and T cell development and maturation in WT and *Neil1*<sup>-/-</sup> mice. (A) FACS profiles of bone marrow cells. (B) FACS profiles of B220<sup>+</sup> cells in the spleen. (C) FACS profiles of TCRβ<sup>+</sup> cells in the spleen. (D) Class switch recombination. Spleen B cells were stimulated with 10 μg/ml of LPS plus 10 ng/ml of interleukin-4 and analyzed for IgG1 expression 3 days later by FACS. Representative results of three pairs of WT and *Neil1*<sup>-/-</sup> mice are shown.

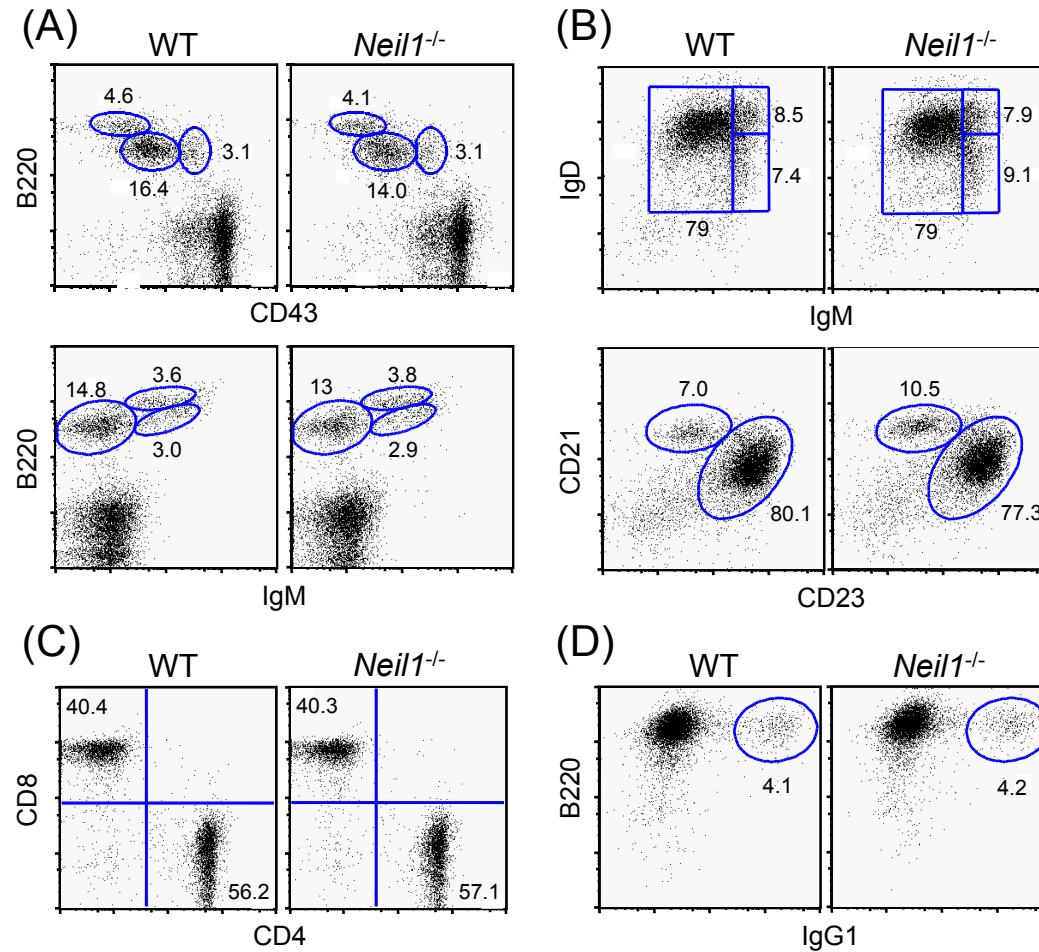

## Supplemental Fig. S2.

Accumulation of Tg lesions in WT and *Neil1*<sup>-/-</sup> B cells after immunization with the T-dependent antigen NP-CGG. WT and *Neil1*<sup>-/-</sup> mice were immunized with NP-CGG. Two weeks later, spleen B cells were purified and stained for Tg and GL7 as described in Materials and methods. GL7 was used to mark GC B cells. Representative images of WT (left 2 panels) and *Neil1*<sup>-/-</sup> (right 2 panels) B cells are shown.

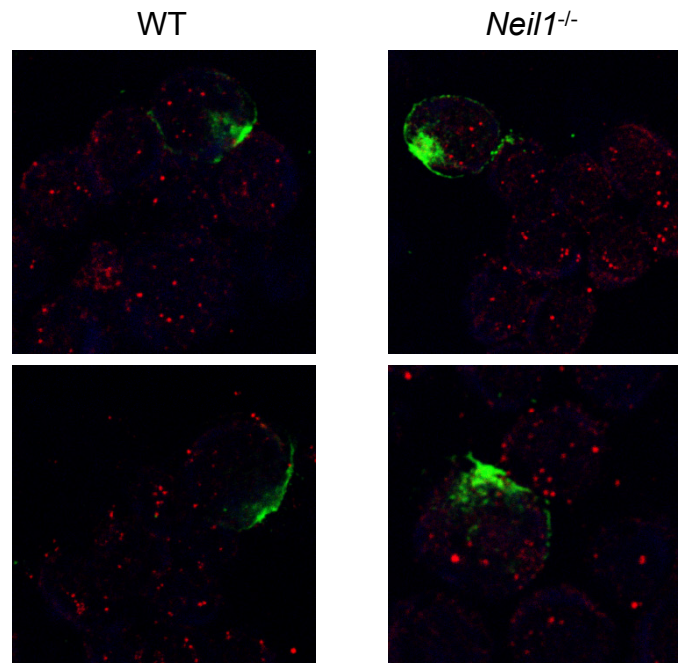

### Supplemental Fig. S3.

Mutation patterns in Ig genes (J<sub>H</sub>4 intronic region ) of WT and *Neil1*<sup>-/-</sup> mice.

#### WT

|      |   | To   | A    | C    | G    | T    | % |
|------|---|------|------|------|------|------|---|
| From | A | *    | 6.08 | 14.9 | 9.87 | 30.9 |   |
|      | C | 6.01 | *    | 6.01 | 12.4 | 24.4 |   |
|      | G | 14.6 | 6.89 | *    | 3.64 | 25.1 |   |
|      | T | 5.08 | 9.65 | 4.90 | *    | 19.6 |   |

#### *Neil1*<sup>-/-</sup>

|      |   | To   | A    | C    | G    | T    | % |
|------|---|------|------|------|------|------|---|
| From | A | *    | 4.19 | 18.1 | 8.03 | 30.3 |   |
|      | C | 3.82 | *    | 6.08 | 12.2 | 22.1 |   |
|      | G | 14.5 | 9.06 | *    | 5.71 | 29.3 |   |
|      | T | 5.85 | 10.1 | 2.37 | *    | 18.3 |   |
